# Supplementary material
Source: PubMed Central journal article supplement (PMC1480476)

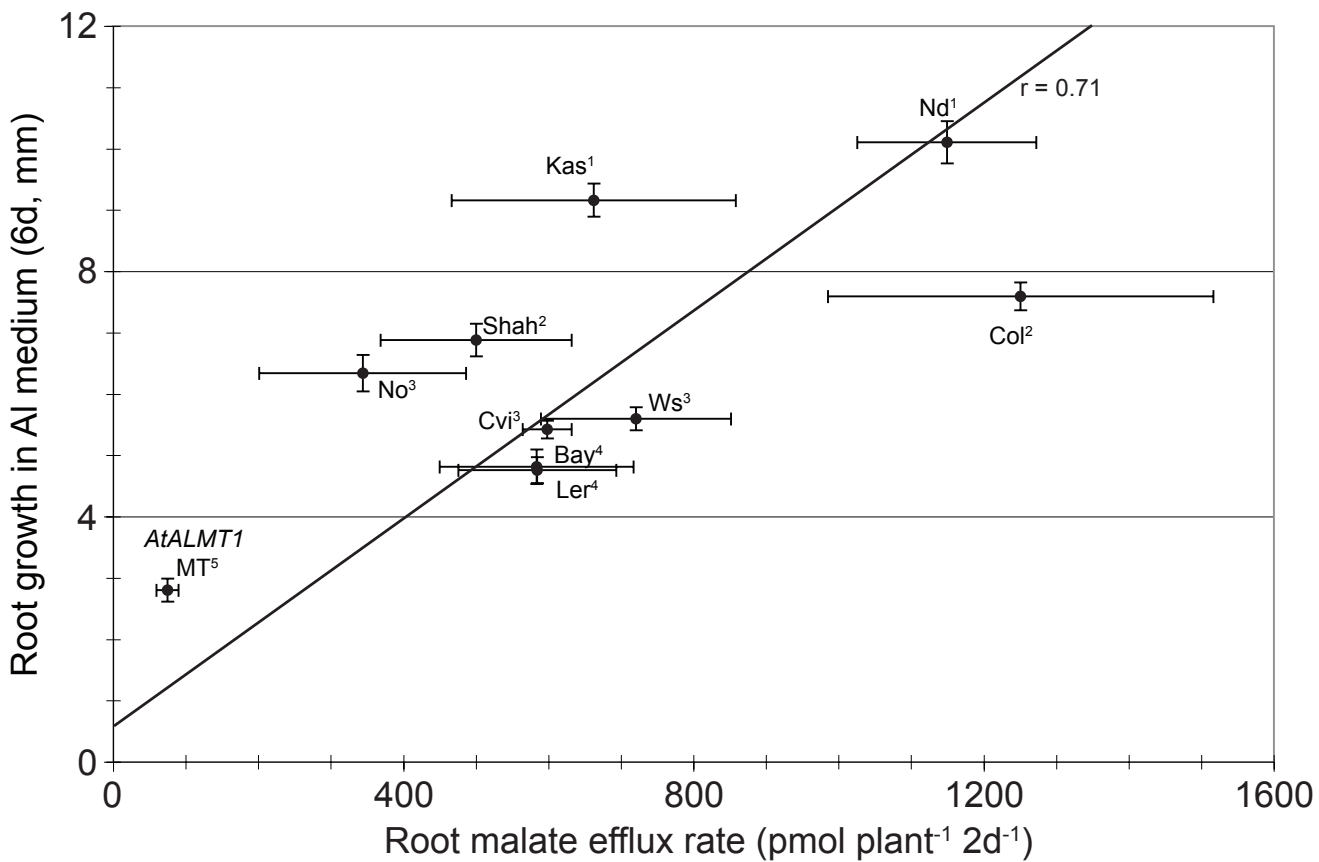

Supplement: pnas_0602868103_1.pdf [file pnas_0602868103_1.pdf]

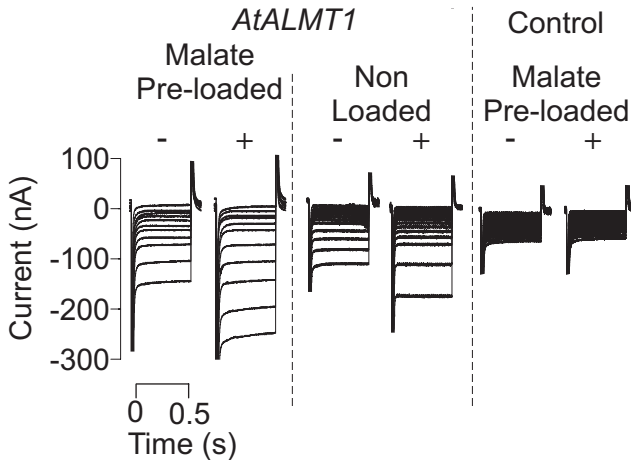

Supplement: pnas_0602868103_2.pdf [file pnas_0602868103_2.pdf]
